# Supplementary material for: Characterization of 4,4′-biphenylene-silicas and a chiral sensor for silicas
Source: Royal Society of Chemistry journal article supplement (doi:10.1039/c1cc14766h), 2011-01-01
Supplement: c1cc14766h.pdf [file c1cc14766h.pdf]

## Characterization of 4,4'-biphenylene-silicas and a chiral sensor for silicas

Baozong Li,<sup>a</sup> Zhen Xu,<sup>a</sup> Wei Zhuang,<sup>a</sup> Yi Chen,<sup>b</sup> Sibing Wang,<sup>a</sup> Yi Li,<sup>a</sup> Mingliang Wang,<sup>b\*</sup> and Yonggang Yang<sup>a\*</sup>

<sup>a</sup>Jiangsu Key Laboratory of Advanced Functional Polymer Design and Application, Department of Polymer Science and Engineering, College of Chemistry, Chemical Engineering and Materials Science, Soochow University, Suzhou 215123, P.R. China

<sup>b</sup>School of Chemistry and Chemical Engineering, Shenzhen University, Shenzhen 518060, P. R. China.

E-mail: M. Wang, ml\_wangus@yahoo.com; Y. Yang, ygyang@suda.edu.cn

### General methods

The FT-IR spectrum was taken on a Jasco FS-420 spectrometer. The <sup>1</sup>H NMR spectrum was recorded on a Bruker AVANCE 400 spectrometer in DMSO-*d*<sub>6</sub> solutions using TMS as an internal standard. Elemental analysis was performed on a Perkin Elmer series II CHNS/O analyzer 2400. Field emission scanning electron microscopy (FESEM) images were taken on a Hitachi S-4700 operating at 15 kV. Transmission electron microscopy (TEM) images were obtained using a TecnaiG220. Specific surface area and pore-size distribution were determined by the Brunauer-Emmett-Teller (BET) and Barrett-Joyner-Halenda (BJH) methods using N<sub>2</sub> adsorption isotherm measured by a Micromeritics ASAP 2020M+C instrument. Small angle X-ray diffraction (SAXRD) and wide angle X-ray diffraction (WAXRD) patterns were taken on an X' Pert-Pro MPD X-ray diffractometer. Circular dichroism (CD) spectra were taken on an AVIV 410 spectrometer.

### Chemicals

BTSB and tetraethoxysilane (TEOS) were purchased from Aldrich. Sodium hydroxide and ethanol were purchased from Sinopharm Chemical Reagent Co., Ltd.

*Characterization of L-18Phg4PyBr*: FT-IR (KBr): 3276 cm<sup>-1</sup> (ν<sub>N-H</sub>, amide A), 1636 cm<sup>-1</sup> (ν<sub>C=O</sub>, amide I), 1543 cm<sup>-1</sup> (ν<sub>N-H</sub>, amide II). <sup>1</sup>H-NMR (400 MHz, DMSO-*d*<sub>6</sub>, TMS, 25 °C): δ = 0.84 (t, J = 6.3 Hz, 3H; CH<sub>3</sub>), 1.22 (br, 30H; alkyl), 1.68-1.88 (m, 2H; CONHCH<sub>2</sub>CH<sub>2</sub>), 2.14-2.16 (m, 2H; CH<sub>2</sub>CONH), 3.02-3.04 (m, 2H; PyCH<sub>2</sub>CH<sub>2</sub>), 2.26-2.31 (m, 2H; CONHCH<sub>2</sub>), 5.36 (d, J = 7.8 Hz, 1H; NHCHCO), 7.31 (m, 2H; 4-PhH), 7.38 (t, J = 7.6 Hz, 1H; 3-PhH), 7.52 (d, J = 7.2 Hz, 1H; 2-PhH), 7.53 (s, 1H; CONHCH<sub>2</sub>), 8.13 (d, J = 6.6 Hz, 1H; CONHCH), 8.62 (t, J = 8.7 Hz, 2H; 3-PyH), 8.68 (t, J = 7.8 Hz, 1H; 4-PyH), 9.07 (d, J = 6.3 Hz, 2H; 2-PyH). C<sub>35</sub>H<sub>56</sub>BrN<sub>3</sub>O<sub>2</sub> (Mw: 630.74). Elemental analysis calcd (%): C, 66.65; H, 8.95; N, 6.66. Found: C, 65.87; H, 9.85; N, 6.63.

*Synthetic procedure for S1*: Amphiphile L-18Phg4PyBr (100 mg, 0.16 mmol) was dissolved in a mixture of ethanol (5.0 mL), deionized water (20 mL) and aqueous NaOH solution (2.0 M, 0.175 mL) under stirring at 60 °C. To this solution, BTSB (0.4 mL, 0.87 mmol) was added. The mixture was continuously stirred and kept 60 °C for additional 2.0 h. After that, the products were collected by filtration, and extracted with a mixture of methanol and hydrochloric acid for 48 h. Finally, the sample was dried in air.

*Synthetic procedure for S2*: Amphiphile L-18Phg4PyBr (100 mg, 0.16 mmol) was dissolved in a mixture of ethanol (10.0 mL), deionized water (15 mL) and aqueous NaOH solution (2.0 M, 0.175 mL) under stirring at 60 °C. To this solution, BTSB (0.4 mL, 0.87 mmol) was added. The mixture was continuously stirred and kept 60 °C for additional 2.0 h. After that, the products were collected by

filtration, and extracted with a mixture of methanol and hydrochloric acid for 48 h. Finally, the sample was dried in air.

*Synthetic procedure for CS100:* Amphiphile L-**18Phg4PyBr** (100 mg, 0.16 mmol) was dissolved in a mixture of deionized water (25 mL) and aqueous NaOH solution (2.0 M, 0.175 mL) under stirring at 60 °C. To this solution, BTSB (0.4 mL, 0.87 mmol) was added. The mixture was continuously stirred and kept 60 °C for additional 2.0 h. After that, the products were collected by filtration, and and extracted with a mixture of methanol and hydrochloric acid for 48 h. Finally, the sample was dried in air.

*Synthetic procedure for CS10:* Amphiphile L-**18Phg4PyBr** (100 mg, 0.16 mmol) was dissolved in a mixture of deionized water (25 mL) and aqueous NaOH solution (2.0 M, 0.175 mL) under stirring at 60 °C. To this solution, a mixture of TEOS (0.45 mL, 2.0 mmol) and BTSB (50 µL, 0.11 mmol) was added. The mixture was continuously stirred and kept 60 °C for additional 2.0 h. After that, the products were collected by filtration, and and extracted with a mixture of methanol and hydrochloric acid for 48 h. Finally, the sample was dried in air.

*Synthetic procedure for CS1:* Amphiphile L-**18Phg4PyBr** (100 mg, 0.16 mmol) was dissolved in a mixture of deionized water (25 mL) and aqueous NaOH solution (2.0 M, 0.175 mL) under stirring at 60 °C. To this solution, a mixture of TEOS (0.495 mL, 2.2 mmol) and BTSB (5.0 µL, 0.011 mmol) was added. The mixture was continuously stirred and kept 60 °C for additional 2.0 h. After that, the products were collected by filtration, and and extracted with a mixture of methanol and hydrochloric acid for 48 h. Finally, the sample was dried in air.

*Synthetic procedure for CS0:* Amphiphile L-**18Phg4PyBr** (100 mg, 0.16 mmol) was dissolved in a mixture of deionized water (25 mL) and aqueous NaOH solution (2.0 M, 0.175 mL) under stirring at 60 °C. To this solution, TEOS (0.5 mL, 2.2 mmol) was added. The mixture was continuously stirred and kept 60 °C for additional 2.0 h. After that, the products were collected by filtration, and and extracted with a mixture of methanol and hydrochloric acid for 48 h. Finally, the sample was dried in air.

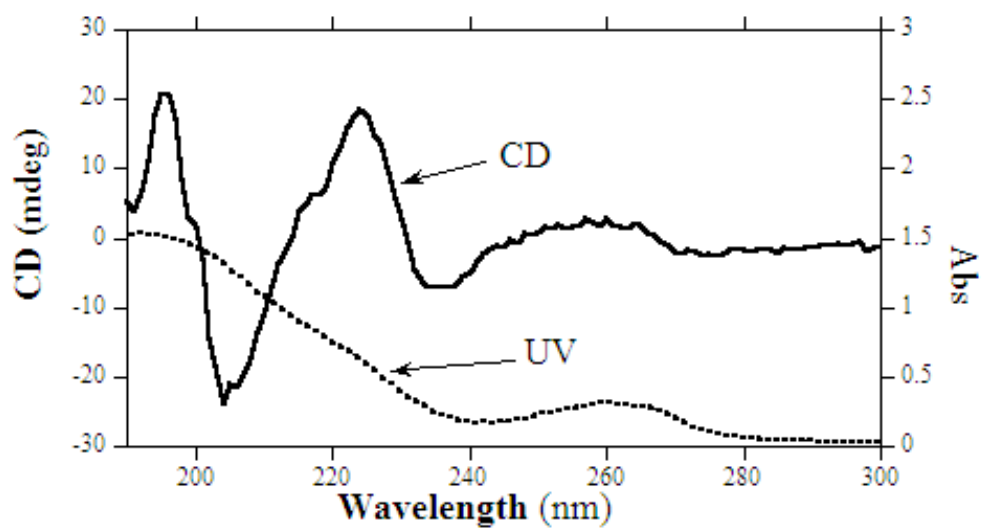

**Figure S1.** CD and UV spectra of L-18Phg4PyBr hydrogel.

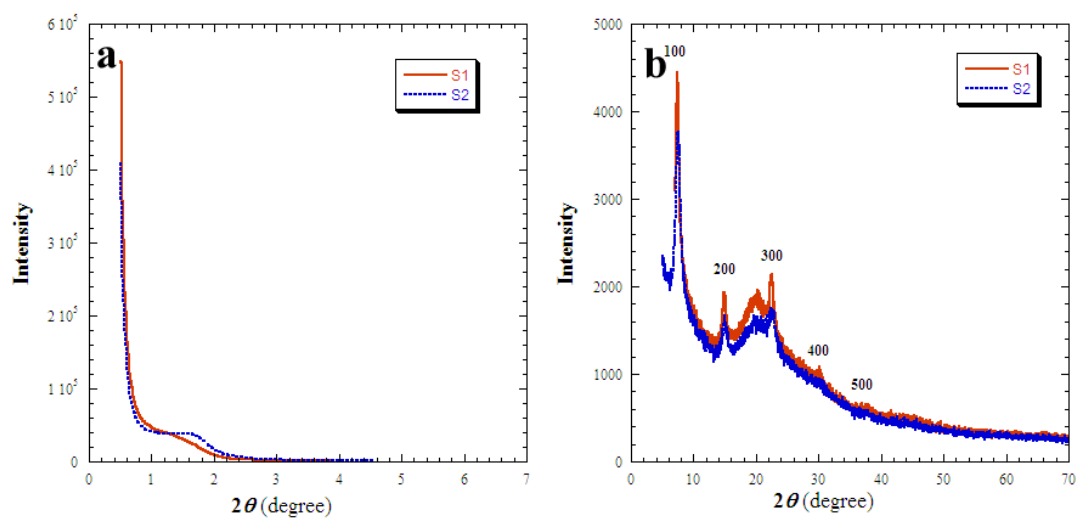

**Figure S2.** (a) SAXRD and (b) WAXRD patterns of the 4,4'-biphenylene-silicas, **S1** and **S2**.

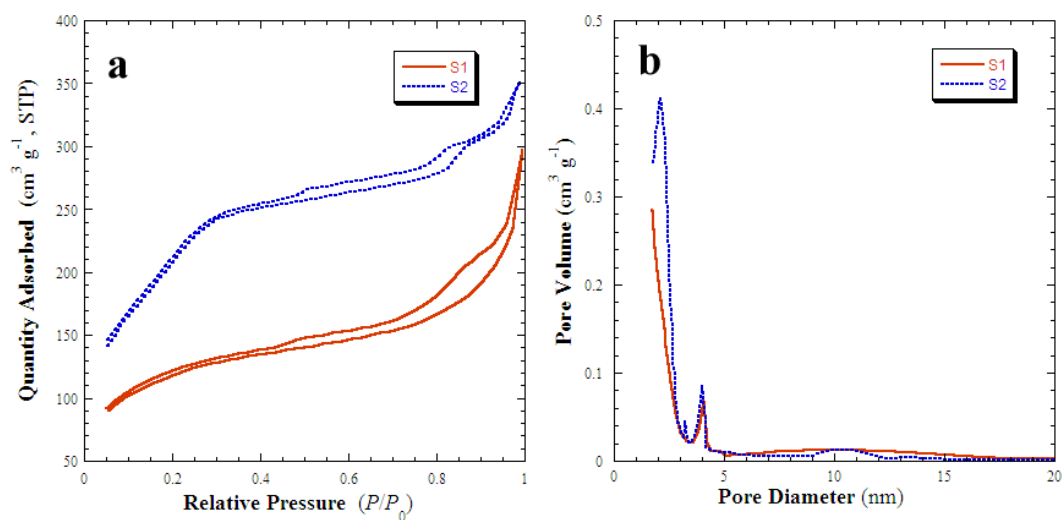

**Figure S3.** Sorption isotherms (a) and BJH pore size distribution (b) of the 4,4'-biphenylene-silicas, **S1** and **S2**. The sorption isotherms were determined by  $\text{N}_2$  sorption-desorption measurements, and the pore size distributions were evaluated from the desorption branches.

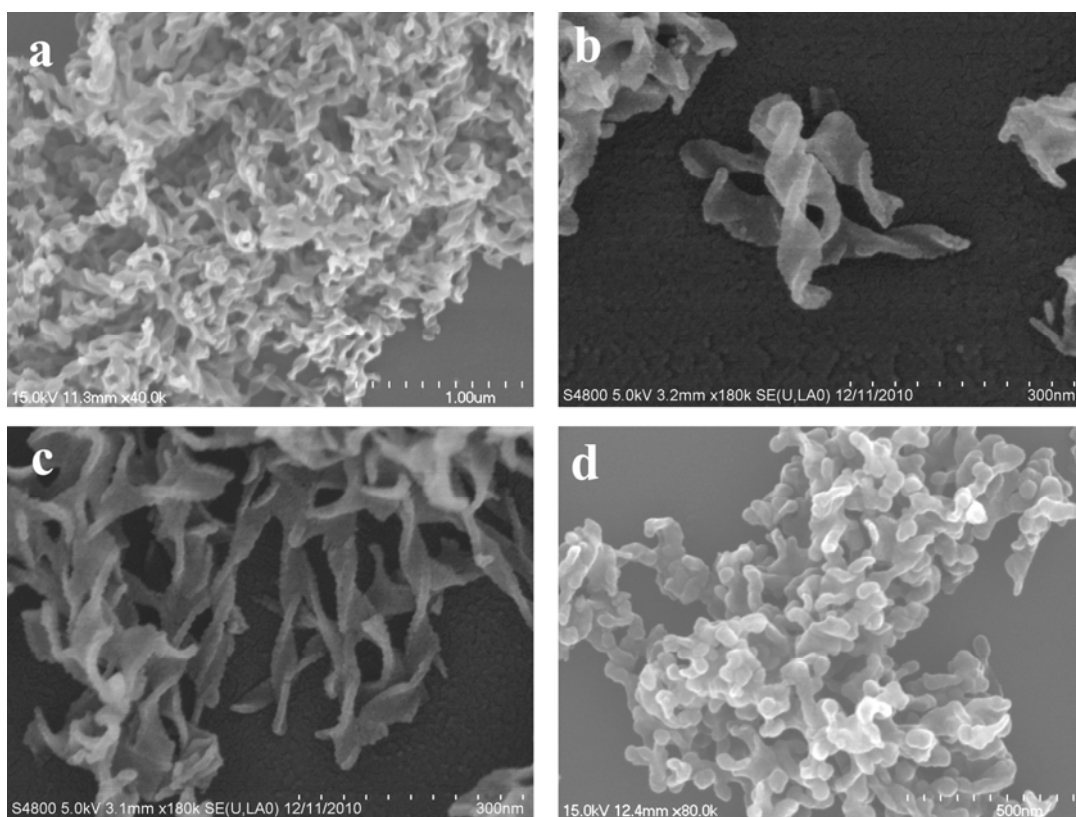

**Figure S4.** FESEM images of the samples (a) CS0, (b) CS1, (c) CS10, and (d) CS100.

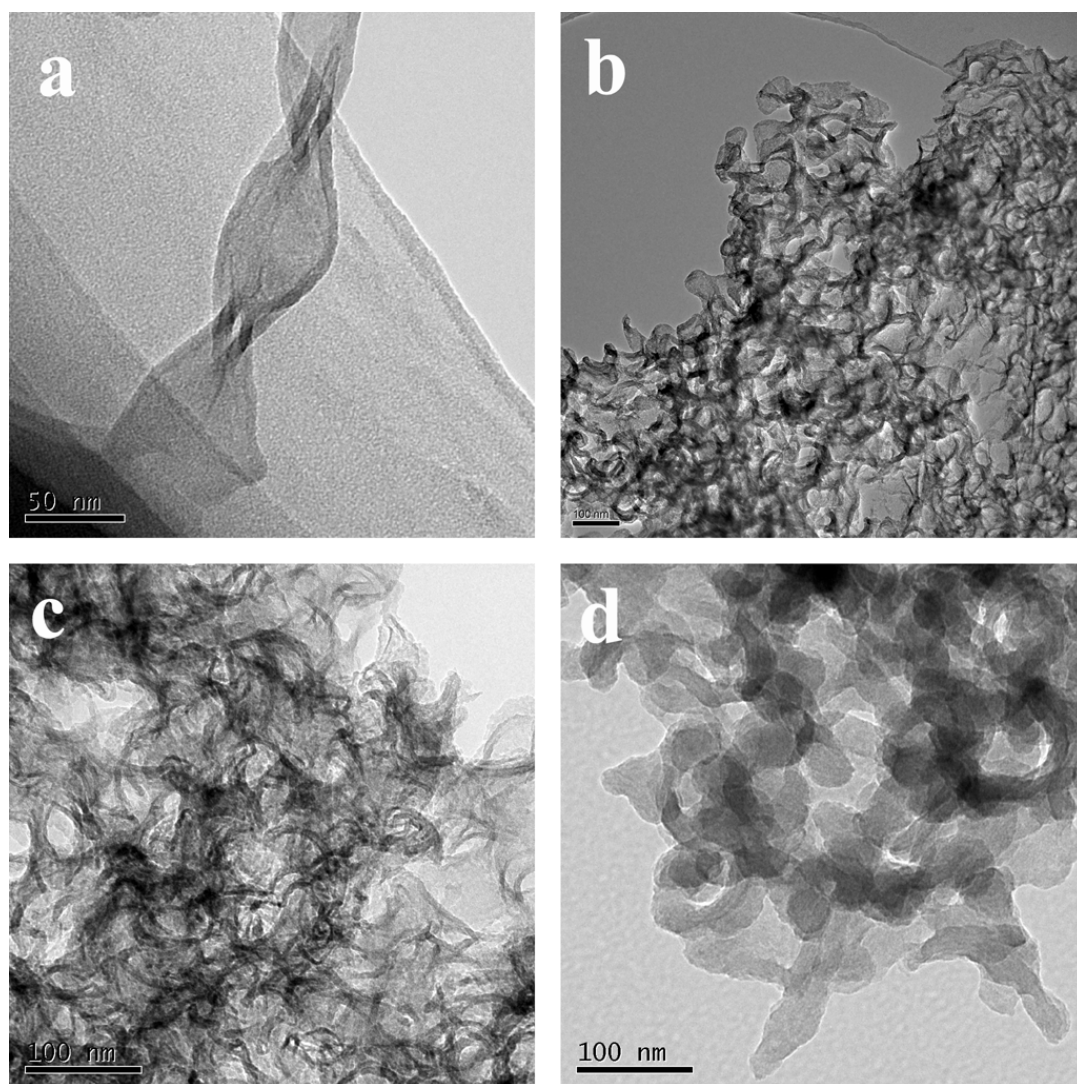

**Figure S5.** TEM images of the samples (a) **CS0**, (b) **CS1**, (c) **CS10**, and (d) **CS100**.

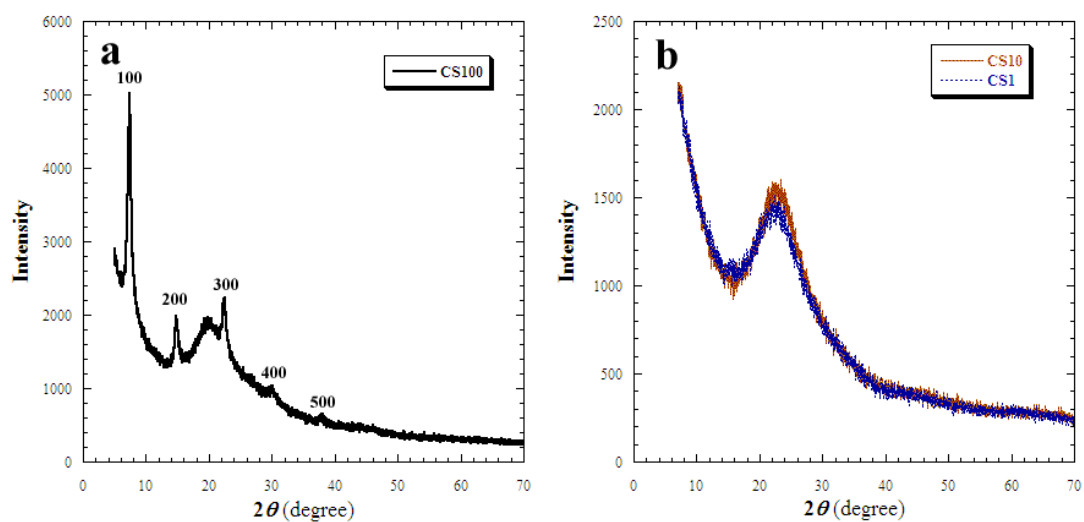

**Figure S6.** WAXRD patterns of the organic-inorganic hybrid silicas, CS100, CS10, and CS1.
